# Supplementary material
Source: PubMed Central journal article supplement (PMC3610731)
Supplement: cc-12-837-s03.pdf [file cc-12-837-s03.pdf]

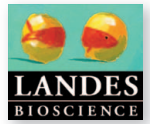

## **Supplemental Material to:**

**Mythili Yenjerla, Andreas Panopoulos, Caroline Reynaud,  
Rati Fotedar and Robert L. Margolis**

**TD-60 is required for interphase cell cycle progression**

**2013; 12(5)**

**<http://dx.doi.org/10.4161/cc.23821>**

**<http://www.landesbioscience.com/journals/cc/article/23821>**

**Supplementary material.**

**Video 1** Control (sham transfected) human fibroblasts show normal mitosis. These cells, recorded during 24 hr simultaneously with TD-60 siRNA treated cells, show substantial cell division over the same time course.

**Video 2** Knockdown of TD-60 suppresses mitosis in human fibroblasts. TD-60 siRNA transfected human fibroblasts were recorded from 48 to 72 hr after transfection and the cells exhibited little mitosis during the 24 hr period.
